# Supplementary material
Source: PubMed Central journal article supplement (PMC5114162)
Supplement: NIHMS798415-supplement-Supplemental.pdf [file NIHMS798415-supplement-Supplemental.pdf]

## Supplementary Information

**Supplementary Figure S1: Percentage of AN GWAMA SNPs that also met the p-value threshold in the BMI GWAMA (black dots)**

**Supplementary Table S1: Meta-analysis of GIANT data sets using (a) full GWAS chip data (HapMap imputed) on N~233,000 and (b) Metabochip on N~88,000 (order of SNPs as in Table 1)**

**Supplementary Table S2: 39 novel genome-wide significant BMI loci from a European GWAMA primary analysis (GIANT, Locke et al., 2015; Table 1) assessed in the GWAMA for AN (GCAN, Boraska et al., 2014)**

**Supplementary Table S3: 17 novel genome-wide significant BMI loci from secondary analyses (e.g. non-European, sex specific; GIANT, Locke et al., 2015; Table 2) assessed in a GWAMA for AN (GCAN, Boraska et al., 2014)**

**Supplementary Table S4: Previously known genome-wide significant BMI loci (GIANT, Locke et al., 2015; Extended Data Table 2) assessed in the AN case-control GWAMA (GCAN, Boraska et al., 2014)**

**Supplementary Table S5: Genome-wide significant loci for BMI, obesity, childhood obesity not described in Locke et al., 2015 (reviewed in Yazdi et al. 2015, Table 2) assessed in the GWAMA for AN (GCAN, Boraska et al., 2014)**

**Supplementary Table S6: 68 genome-wide significant WHR loci from a European GWAMA primary analysis (GIANT, Shungin et al., 2015; Tables 1 and 3) assessed in the GWAMA for AN (GCAN, Boraska et al., 2014)**

**Supplementary Table S7: *In silico* mutation analyses pertaining to the four identified genes (ExAC Browser (Beta); Exome Aggregation Consortium)**

**Supplementary Table S8: association test of the nine AN / BMI SNPs with adult obesity in GIANT extreme (order of SNPs as in Table 1)**

**Supplementary Figure S1: Percentage of AN GWAMA SNPs that also met the p-value threshold in the BMI GWAMA (black dots)**

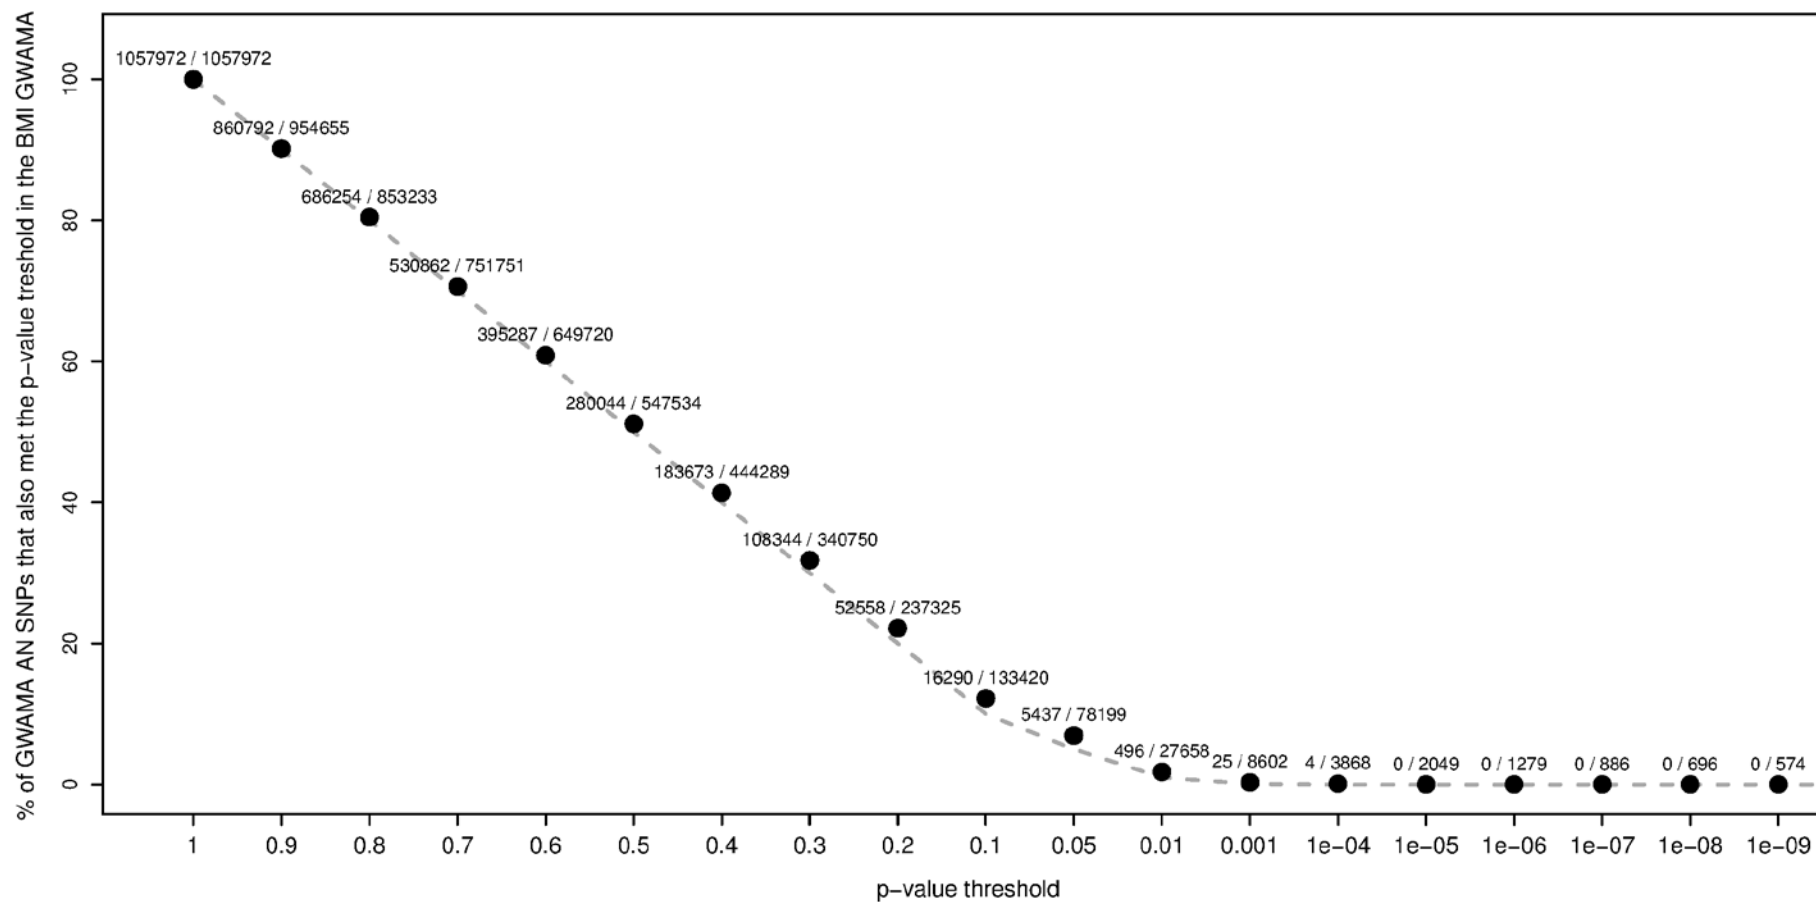

The relative frequency is derived for “the absolute number of SNP association signals that meet the p-value threshold on the x-axis in both GWAMAs” / “the absolute number of SNP association signals that meet the p-value threshold on the x-axis in the BMI GWAMA only”. The dashed grey line indicates the expected relative frequency of SNP association signals a given p-value threshold on the x-axis (i.e. “the absolute number of SNP association signals that meet the p-value threshold on the x-axis in the BMI GWAMA only” divided by the total number of 1,057,972 SNPs in the intersection data set of both GWAMAS).

**Supplementary Table S1: Meta-analysis of GIANT data sets using (a) full GWAS chip data (HapMap imputed) on N~233,000 and (b) Metabochip on N~88,000 (order of SNPs as in Table 1)**

**(a)**

| SNP        | Overall |         |        |            |        | Women   |           |        | Men     |           |        |
|------------|---------|---------|--------|------------|--------|---------|-----------|--------|---------|-----------|--------|
|            | EA      | Beta    | Se     | P          | N      | Beta    | P         | N      | Beta    | P         | N      |
| rs1561589  | 0.34    | 0.0151  | 0.0041 | 0.0002126  | 233684 | 0.0182  | 0.0002506 | 131940 | 0.0101  | 0.06284   | 104455 |
| rs12771627 | 0.73    | -0.0153 | 0.0043 | 0.0004029  | 233437 | -0.0176 | 0.001197  | 131818 | -0.0114 | 0.05259   | 104330 |
| rs11245456 | 0.75    | -0.0162 | 0.0046 | 0.0003944  | 233423 | -0.0189 | 0.0008474 | 131809 | -0.0122 | 0.04986   | 104325 |
| rs17513613 | 0.67    | -0.017  | 0.0041 | 0.00003052 | 233857 | -0.014  | 0.005912  | 132029 | -0.0201 | 0.000287  | 104538 |
| rs17406900 | 0.48    | -0.0142 | 0.0037 | 0.0001276  | 233805 | -0.0131 | 0.005708  | 132018 | -0.0157 | 0.001606  | 104497 |
| rs7593917  | 0.46    | -0.0127 | 0.0037 | 0.0006116  | 233851 | -0.0109 | 0.0184    | 132026 | -0.0148 | 0.002941  | 104536 |
| rs11691351 | 0.45    | -0.013  | 0.0037 | 0.0004526  | 233969 | -0.0115 | 0.01288   | 132086 | -0.0148 | 0.002941  | 104593 |
| rs8102137  | 0.67    | -0.0169 | 0.0041 | 0.00003397 | 233987 | -0.014  | 0.005912  | 132096 | -0.0198 | 0.0002653 | 104600 |
| rs7573079  | 0.45    | -0.0125 | 0.0037 | 0.000745   | 233960 | -0.0109 | 0.0184    | 132078 | -0.0146 | 0.003349  | 104590 |

**(b)**

| SNP        | Overall |         |        |          |       | Women   |           |       | Men     |         |       |
|------------|---------|---------|--------|----------|-------|---------|-----------|-------|---------|---------|-------|
|            | EA      | Beta    | Se     | P        | N     | Beta    | P         | N     | Beta    | P       | N     |
| rs1561589  | 0.34    | 0.0168  | 0.0057 | 0.003215 | 88093 | 0.0289  | 0.0001778 | 39845 | 0.0063  | 0.3817  | 48248 |
| rs12771627 | 0.74    | -0.0179 | 0.0061 | 0.003603 | 87991 | -0.0274 | 0.0009878 | 39795 | -0.0097 | 0.2158  | 48196 |
| rs11245456 | 0.76    | -0.0189 | 0.0064 | 0.003019 | 88049 | -0.0253 | 0.002987  | 39825 | -0.014  | 0.08195 | 48224 |
| rs17513613 | 0.67    | -0.0114 | 0.0056 | 0.04142  | 88108 | -0.0061 | 0.4227    | 39854 | -0.0174 | 0.01568 | 48254 |
| rs17406900 | 0.50    | -0.0118 | 0.0054 | 0.02789  | 88118 | -0.0189 | 0.009662  | 39852 | -0.006  | 0.376   | 48266 |
| rs7593917  | 0.48    | -0.014  | 0.0057 | 0.01408  | 80721 | -0.027  | 0.0003221 | 38126 | -0.0021 | 0.7706  | 42595 |
| rs11691351 | 0.48    | -0.0118 | 0.0054 | 0.02789  | 88118 | -0.022  | 0.002594  | 39852 | -0.0029 | 0.6735  | 48266 |
| rs8102137  | NA      | NA      | NA     | NA       | NA    | NA      | NA        | NA    | NA      | NA      | NA    |
| rs7573079  | 0.48    | -0.0123 | 0.0054 | 0.02191  | 88065 | -0.0223 | 0.002264  | 39839 | -0.0035 | 0.6111  | 48226 |

**Supplementary Table S2: 39 novel genome-wide significant BMI loci from a European GWAMA primary analysis (GIANT, Locke et al., 2015; Table 1) assessed in the GWAMA for AN (GCAN, Boraska et al., 2014)**

| Chromosome /<br>position<br>SNP<br>Notable gene(s)<br>(as annotated by<br>Locke et al., 2015) | BMI increasing alleles<br>(GIANT, Locke et al., 2015; Table 1) |               |                        | BMI increasing alleles in AN case-control GWAMA<br>(GCAN, Boraska et al., 2014) |                                                    |         |                                  |                                              |
|-----------------------------------------------------------------------------------------------|----------------------------------------------------------------|---------------|------------------------|---------------------------------------------------------------------------------|----------------------------------------------------|---------|----------------------------------|----------------------------------------------|
|                                                                                               | BMI<br>increasing<br>allele /<br>frequency                     | $\beta$ (SE)  | p-value                | Frequency of<br>reference allele<br>in AN cases                                 | AN risk (odds<br>ratio)<br>for reference<br>allele | p-value | adjusted <sup>a</sup><br>p-value | Direction of<br>effect <sup>b</sup><br>+ / - |
| 1:49,362,434<br>rs657452<br><i>AGBL4</i>                                                      | A / 0.394                                                      | 0.023 (0.003) | $5.48 \times 10^{-13}$ | A / 0.395                                                                       | 1.026                                              | 0.40    | 1                                | NE                                           |
| 11:114,527,614<br>rs12286929<br><i>CADM1</i>                                                  | G / 0.523                                                      | 0.022 (0.003) | $1.31 \times 10^{-12}$ | G / 0.523                                                                       | 0.977                                              | 0.44    | 1                                | NE                                           |
| 10:114,748,339<br>rs7903146<br><i>TCF7L2</i>                                                  | C / 0.713                                                      | 0.023 (0.003) | $1.11 \times 10^{-11}$ | C / 0.709                                                                       | 1.015                                              | 0.65    | 1                                | NE                                           |
| 14:24,998,019<br>rs10132280<br><i>STXBP6</i>                                                  | C / 0.682                                                      | 0.023 (0.003) | $1.14 \times 10^{-11}$ | A / 0.310                                                                       | 0.976                                              | 0.46    | 1                                | NE                                           |
| 10:102,385,430<br>rs17094222<br><i>HIF1AN</i>                                                 | C / 0.211                                                      | 0.025 (0.004) | $5.94 \times 10^{-11}$ | T / 0.793                                                                       | 0.988                                              | 0.75    | 1                                | NE                                           |
| 2:213,121,476<br>rs7599312<br><i>ERBB4</i>                                                    | G / 0.724                                                      | 0.022 (0.003) | $1.17 \times 10^{-10}$ | G / 0.729                                                                       | 0.980                                              | 0.56    | 1                                | NE                                           |
| 3:61,211,502<br>rs2365389<br><i>FHIT</i>                                                      | C / 0.582                                                      | 0.020 (0.003) | $1.63 \times 10^{-10}$ | <sup>c</sup> rs6785875<br>T / 0.579                                             | 0.982                                              | 0.55    | 1                                | NE                                           |

- continued -

**Supplementary Table S2: 39 novel genome-wide significant BMI loci from a European GWAMA primary analysis (GIANT, Locke et al., 2015; Table 1) assessed in the GWAMA for AN (GCAN, Boraska et al., 2014)**

|                                                                                          |           |               |                         |                                      |       |      |    |    |
|------------------------------------------------------------------------------------------|-----------|---------------|-------------------------|--------------------------------------|-------|------|----|----|
| 1:200,050,910<br>rs2820292<br><i>NAV1</i>                                                | C / 0.555 | 0.020 (0.003) | $1.83 \times 10^{-10}$  | A / 0.459                            | 0.993 | 0.82 | 1  | NE |
| 14:28,806,589<br>rs12885454<br><i>PRKD1</i>                                              | C / 0.642 | 0.021 (0.003) | $1.894 \times 10^{-10}$ | <sup>c</sup> rs11625899<br>T / 0.338 | 0.956 | 0.16 | 1  | NE |
| 3:142,758,126<br>rs16851483<br><i>RASA2</i>                                              | T / 0.066 | 0.048 (0.008) | $3.55 \times 10^{-10}$  | G / 0.943                            | 0.883 | 0.06 | 1  | NE |
| 7:75,001,105<br>rs1167827<br><i>HIP1; PMS2L3;<br/>PMS2P5;<br/>WBSCR16</i>                | G / 0.553 | 0.020 (0.003) | $6.33 \times 10^{-10}$  | G / 0.565                            | 0.975 | 0.41 | 1  | NE |
| 16:3,567,359<br>rs758747<br><i>NLRC3</i>                                                 | T / 0.265 | 0.023 (0.004) | $7.47 \times 10^{-10}$  | NA                                   | NA    | NA   | NA | NA |
| 9:119,418,304<br>rs1928295<br><i>TLR4</i>                                                | T / 0.548 | 0.019 (0.003) | $7.91 \times 10^{-10}$  | T / 0.551                            | 1.010 | 0.75 | 1  | NE |
| 16:31,037,396<br>rs9925964<br><i>KAT8; ZNF646;<br/>VKORC1; ZNF668;<br/>STX1B; FBXL19</i> | A / 0.620 | 0.019 (0.003) | $8.11 \times 10^{-10}$  | <sup>c</sup> rs1978487<br>C / 0.396  | 1.050 | 0.12 | 1  | NE |

- continued -

**Supplementary Table S2: 39 novel genome-wide significant BMI loci from a European GWAMA primary analysis (GIANT, Locke et al., 2015; Table 1) assessed in the GWAMA for AN (GCAN, Boraska et al., 2014)**

|                                                                  |           |               |                        |           |       |      |   |    |
|------------------------------------------------------------------|-----------|---------------|------------------------|-----------|-------|------|---|----|
| 2:26,782,315<br>rs11126666<br><i>KCNK3</i>                       | A / 0.283 | 0.021 (0.003) | $1.33 \times 10^{-09}$ | G / 0.735 | 0.960 | 0.24 | 1 | NE |
| 16:28,240,912<br>rs2650492<br><i>SBK1; APOBR</i>                 | A / 0.303 | 0.021 (0.004) | $1.92 \times 10^{-09}$ | G / 0.712 | 0.987 | 0.69 | 1 | NE |
| 3:25,081,441<br>rs6804842<br><i>RARB</i>                         | G / 0.575 | 0.019 (0.003) | $2.48 \times 10^{-09}$ | A / 0.429 | 0.962 | 0.21 | 1 | NE |
| 9:15,624,326<br>rs4740619<br><i>C9orf93</i>                      | T / 0.542 | 0.018 (0.003) | $4.56 \times 10^{-09}$ | T / 0.553 | 1.030 | 0.33 | 1 | NE |
| 6:162,953,340<br>rs13191362<br><i>PARK2</i>                      | A / 0.879 | 0.028 (0.005) | $7.34 \times 10^{-09}$ | A / 0.880 | 0.971 | 0.54 | 1 | NE |
| 15:49,535,902<br>rs3736485<br><i>SCG3; DMXL2</i>                 | A / 0.454 | 0.018 (0.003) | $7.41 \times 10^{-09}$ | A / 0.444 | 0.946 | 0.07 | 1 | NE |
| 4:77,348,592<br>rs17001654<br><i>NUP54; SCARB2</i>               | G / 0.153 | 0.031 (0.005) | $7.76 \times 10^{-09}$ | C / 0.844 | 1.033 | 0.44 | 1 | NE |
| 10:104,859,028<br>rs11191560<br><i>NT5C2; CYP17A1;<br/>SFXN2</i> | C / 0.089 | 0.031 (0.005) | $8.45 \times 10^{-09}$ | T / 0.910 | 0.940 | 0.24 | 1 | NE |

- continued -

**Supplementary Table S2: 39 novel genome-wide significant BMI loci from a European GWAMA primary analysis (GIANT, Locke et al., 2015; Table 1) assessed in the GWAMA for AN (GCAN, Boraska et al., 2014)**

|                                                                   |           |               |                        |                                      |       |      |   |    |
|-------------------------------------------------------------------|-----------|---------------|------------------------|--------------------------------------|-------|------|---|----|
| 2:181,259,207<br>rs1528435<br><i>UBE2E3</i>                       | T / 0.631 | 0.018 (0.003) | $1.20 \times 10^{-08}$ | T / 0.629                            | 1.039 | 0.22 | 1 | NE |
| 17:5,223,976<br>rs1000940<br><i>RABEP1</i>                        | G / 0.320 | 0.019 (0.003) | $1.28 \times 10^{-08}$ | A / 0.705                            | 0.944 | 0.09 | 1 | NE |
| 6:40,456,631<br>rs2033529<br><i>TDRG1; LRFN2</i>                  | G / 0.293 | 0.019 (0.003) | $1.39 \times 10^{-08}$ | A / 0.715                            | 1.008 | 0.80 | 1 | NE |
| 1:50,332,407<br>rs11583200<br><i>ELAVL4</i>                       | C / 0.396 | 0.018 (0.003) | $1.48 \times 10^{-08}$ | C / 0.379                            | 0.985 | 0.62 | 1 | NE |
| 6:109,084,356<br>rs9400239<br><i>FOXO3;</i><br><i>HSS00296402</i> | C / 0.688 | 0.019 (0.003) | $1.61 \times 10^{-08}$ | <sup>c</sup> rs4946932<br>C / 0.682  | 0.959 | 0.21 | 1 | NE |
| 9:128,500,735<br>rs10733682<br><i>LMX1B</i>                       | A / 0.478 | 0.017 (0.003) | $1.83 \times 10^{-08}$ | G / 0.494                            | 1.055 | 0.08 | 1 | NE |
| 2:62,906,552<br>rs11688816<br><i>EHBP1</i>                        | G / 0.525 | 0.017 (0.003) | $1.89 \times 10^{-08}$ | G / 0.512                            | 0.983 | 0.57 | 1 | NE |
| 12:121,347,850<br>rs11057405<br><i>CLIP1</i>                      | G / 0.901 | 0.031 (0.006) | $2.02 \times 10^{-08}$ | <sup>c</sup> rs12369179<br>T / 0.085 | 1.001 | 0.99 | 1 | NE |

- continued -

**Supplementary Table S2: 39 novel genome-wide significant BMI loci from a European GWAMA primary analysis (GIANT, Locke et al., 2015; Table 1) assessed in the GWAMA for AN (GCAN, Boraska et al., 2014)**

|                                                       |           |               |                        |                                      |       |      |    |    |
|-------------------------------------------------------|-----------|---------------|------------------------|--------------------------------------|-------|------|----|----|
| 4:145,878,514<br>rs11727676<br><i>HHIP</i>            | T / 0.910 | 0.036 (0.006) | $2.55 \times 10^{-08}$ | NA                                   | NA    | NA   | NA | NA |
| 3:81,874,802<br>rs3849570<br><i>GBE1</i>              | A / 0.359 | 0.019 (0.003) | $2.60 \times 10^{-08}$ | <sup>c</sup> rs11711331<br>A / 0.327 | 0.961 | 0.22 | 1  | NE |
| 9:110,972,163<br>rs6477694<br><i>EPB41L4B; C9orf4</i> | C / 0.365 | 0.017 (0.003) | $2.67 \times 10^{-08}$ | T / 0.656                            | 0.990 | 0.75 | 1  | NE |
| 10:87,400,884<br>rs7899106<br><i>GRID1</i>            | G / 0.052 | 0.040 (0.007) | $2.96 \times 10^{-08}$ | A / 0.947                            | 0.915 | 0.44 | 1  | NE |
| 11:43,820,854<br>rs2176598<br><i>HSD17B12</i>         | T / 0.251 | 0.020 (0.004) | $2.97 \times 10^{-08}$ | <sup>c</sup> rs10838184<br>C / 0.243 | 1.038 | 0.30 | 1  | NE |
| 7:76,446,079<br>rs2245368<br><i>PMS2L11</i>           | C / 0.180 | 0.032 (0.006) | $3.19 \times 10^{-08}$ | NA                                   | NA    | NA   | NA | NA |
| 19:18,315,825<br>rs17724992<br><i>GDF15; PGPEP1</i>   | A / 0.746 | 0.019 (0.004) | $3.42 \times 10^{-08}$ | A / 0.736                            | 1.003 | 0.94 | 1  | NE |
| 18:55,034,299<br>rs7243357<br><i>GRP</i>              | T / 0.812 | 0.022 (0.004) | $3.86 \times 10^{-08}$ | <sup>c</sup> rs9957264<br>A / 0.165  | 1.006 | 0.88 | 1  | NE |



- continued -

**Supplementary Table S2: 39 novel genome-wide significant BMI loci from a European GWAMA primary analysis (GIANT, Locke et al., 2015; Table 1) assessed in the GWAMA for AN (GCAN, Boraska et al., 2014)**

|                                           |           |               |                        |                                    |       |      |   |    |
|-------------------------------------------|-----------|---------------|------------------------|------------------------------------|-------|------|---|----|
| 8:85,242,264<br>rs2033732<br><i>RALYL</i> | C / 0.747 | 0.019 (0.004) | $4.89 \times 10^{-08}$ | <sup>c</sup> rs733594<br>T / 0.718 | 0.962 | 0.26 | 1 | NE |
|-------------------------------------------|-----------|---------------|------------------------|------------------------------------|-------|------|---|----|

<sup>a</sup>unadjusted p-values are adjusted for multiplicity by Bonferroni correction for 97 tests

<sup>b</sup>Direction of effect: + the BMI increasing allele is less frequently found in AN cases as compared to controls; - the BMI increasing allele is more frequently found in AN cases as compared to controls. Direction of effect was only analyzed for SNPs with a nominal p-value < 0.05 in GCAN

<sup>c</sup>Proxy SNAP (Broad Institute) with HapMap release 22, CEU population, r2 threshold of 0.8 and a distance limit of 500 kb

NA: not available; NE: not estimated

**Supplementary Table S3: 17 novel genome-wide significant BMI loci from secondary analyses (e.g. non-European, sex specific; GIANT, Locke et al., 2015; Table 2) assessed in a GWAMA for AN (GCAN, Boraska et al., 2014)**

| SNP                             | Notable gene(s)<br>(as annotated by<br>Locke et al., 2015)            | BMI increasing alleles<br>(GIANT, Locke et al., 2015) |               |                        | BMI increasing alleles in AN case-control GWAMA<br>(GCAN, Boraska et al., 2014) |                                                               |         |                                  |                                              |
|---------------------------------|-----------------------------------------------------------------------|-------------------------------------------------------|---------------|------------------------|---------------------------------------------------------------------------------|---------------------------------------------------------------|---------|----------------------------------|----------------------------------------------|
|                                 |                                                                       | BMI increasing<br>allele / frequency                  | $\beta$ (SE)  | p-value                | Frequency<br>of reference<br>allele in AN<br>cases                              | AN risk<br>(odds<br>ratio)<br>for BMI<br>increasing<br>allele | p-value | adjusted <sup>a</sup><br>p-value | Direction<br>of effect <sup>b</sup><br>+ / - |
| <b>Effect in females</b>        |                                                                       |                                                       |               |                        |                                                                                 |                                                               |         |                                  |                                              |
| rs7239883                       | <i>LOC284260; RIT2</i>                                                | G / 0.391                                             | 0.016 (0.003) | $1.51 \times 10^{-08}$ | A / 0.603                                                                       | 0.939                                                         | 0.04    | 1                                | -                                            |
| rs6465468                       | <i>ASB4</i>                                                           | T / 0.306                                             | 0.017 (0.004) | $4.98 \times 10^{-08}$ | G / 0.692                                                                       | 1.025                                                         | 0.45    | 1                                | NE                                           |
| <b>Effect in males</b>          |                                                                       |                                                       |               |                        |                                                                                 |                                                               |         |                                  |                                              |
| rs492400                        | <i>PLCD4; CYP27A1;<br/>USP37; TTLL4;<br/>STK36; ZNF142;<br/>RQCD1</i> | C / 0.424                                             | 0.016 (0.003) | $6.78 \times 10^{-09}$ | C / 0.431                                                                       | 1.029                                                         | 0.35    | 1                                | NE                                           |
| rs16907751                      | <i>ZBTB10</i>                                                         | C / 0.913                                             | 0.035 (0.007) | $3.89 \times 10^{-08}$ | NA                                                                              | NA                                                            | NA      | NA                               | NA                                           |
| <b>Effect in all ancestries</b> |                                                                       |                                                       |               |                        |                                                                                 |                                                               |         |                                  |                                              |
| rs7164727                       | <i>LOC100287559;BBS4</i>                                              | T / 0.671                                             | 0.018 (0.003) | $3.92 \times 10^{-09}$ | C / 0.313                                                                       | 0.980                                                         | 0.54    | 1                                | NE                                           |
| rs2080454                       | <i>CBLN1</i>                                                          | C / 0.413                                             | 0.017 (0.003) | $8.60 \times 10^{-09}$ | C / 0.381                                                                       | 1.033                                                         | 0.31    | 1                                | NE                                           |
| rs2836754                       | <i>ETS2</i>                                                           | C / 0.599                                             | 0.016 (0.003) | $1.61 \times 10^{-08}$ | T / 0.375                                                                       | 0.994                                                         | 0.85    | 1                                | NE                                           |
| rs9914578                       | <i>SMG6; N29617</i>                                                   | G / 0.229                                             | 0.020 (0.004) | $2.07 \times 10^{-08}$ | <sup>c</sup> rs4061660<br>G / 0.791                                             | 0.969                                                         | 0.40    | 1                                | NE                                           |
| rs977747                        | <i>TAL1</i>                                                           | T / 0.403                                             | 0.017 (0.003) | $2.18 \times 10^{-08}$ | T / 0.371                                                                       | 0.933                                                         | 0.03    | 1                                | +                                            |
| rs1441264                       | <i>MIR548A2</i>                                                       | A / 0.613                                             | 0.018 (0.03)  | $2.96 \times 10^{-08}$ | A / 0.607                                                                       | 1.011                                                         | 0.72    | 1                                | NE                                           |
| rs17203016                      | <i>CREB1; KLF7</i>                                                    | G / 0.195                                             | 0.021 (0.004) | $3.41 \times 10^{-08}$ | A / 0.810                                                                       | 0.997                                                         | 0.93    | 1                                | NE                                           |

- continued -

**Supplementary Table S3: 17 novel genome-wide significant BMI loci from secondary analyses (e.g. non-European, sex specific; GIANT, Locke et al., 2015; Table 2) assessed in a GWAMA for AN (GCAN, Boraska et al., 2014)**

|                                          |                                                                       |           |               |                        |                                      |       |      |   |    |
|------------------------------------------|-----------------------------------------------------------------------|-----------|---------------|------------------------|--------------------------------------|-------|------|---|----|
| rs13201877                               | <i>IFNGR1; OLIG3</i>                                                  | G / 0.140 | 0.023 (0.005) | $4.29 \times 10^{-08}$ | <sup>c</sup> rs3904532<br>G / 0.136  | 0.965 | 0.42 | 1 | NE |
| rs1460676                                | <i>FIGN</i>                                                           | C / 0.179 | 0.020 (0.004) | $4.98 \times 10^{-08}$ | T / 0.832                            | 1.020 | 0.63 | 1 | NE |
| <b>European population-based studies</b> |                                                                       |           |               |                        |                                      |       |      |   |    |
| rs9641123                                | <i>CALCR; hsa-miR-653</i>                                             | C / 0.430 | 0.019 (0.004) | $2.08 \times 10^{-10}$ | <sup>c</sup> rs10464483<br>T / 0.405 | 1.047 | 0.40 | 1 | NE |
| rs9374842                                | <i>LOC285762</i>                                                      | T / 0.744 | 0.019 (0.004) | $2.67 \times 10^{-08}$ | T / 0.742                            | 0.924 | 0.03 | 1 | +  |
| rs4787491                                | <i>MAPK3; KCTD13;<br/>INO80E; TAOK2;<br/>YPEL3; DOC2A;<br/>FAM57B</i> | G / 0.510 | 0.016 (0.004) | $2.70 \times 10^{-08}$ | A / 0.477                            | 0.999 | 0.98 | 1 | NE |
| rs9540493                                | <i>MIR548X2; PCDH9</i>                                                | A / 0.452 | 0.017 (0.003) | $4.97 \times 10^{-08}$ | A / 0.442                            | 0.996 | 0.88 | 1 | NE |

<sup>a</sup> unadjusted p-values are adjusted for multiplicity by Bonferroni correction for 97 tests

<sup>b</sup> Direction of effect: + the BMI increasing allele is *less frequently* found in AN cases as compared to controls; - the BMI increasing allele is more frequently found in AN cases as compared to controls. Direction of effect was only analyzed for SNPs with a nominal p-value < 0.05 in GCAN

<sup>c</sup> Proxy SNAP (Broad Institute) with HapMap release 22, CEU population, r2 threshold of 0.8 and a distance limit of 500 kb,

NA: not available; NE: not estimated

**Supplementary Table S4: 32 previously known genome-wide significant BMI loci (GIANT, Locke et al., 2015; Extended Data Table 2) assessed in the AN case-control GWAMA (GCAN, Boraska et al., 2014)**

| SNP        | Notable gene(s)<br>(as annotated by<br>Locke et al.,<br>2015)   | BMI increasing alleles<br>(GIANT, Locke et al., 2015; Extended Data Table 2) |               |                             | BMI increasing alleles in AN case-control GWAMA<br>(GCAN, Boraska et al., 2014) |                                                               |         |                                  |                                              |
|------------|-----------------------------------------------------------------|------------------------------------------------------------------------------|---------------|-----------------------------|---------------------------------------------------------------------------------|---------------------------------------------------------------|---------|----------------------------------|----------------------------------------------|
|            |                                                                 | BMI increasing allele /<br>frequency                                         | $\beta$ (SE)  | p-value for<br>BMI increase | Frequency<br>of BMI<br>increasing in<br>AN cases                                | AN risk<br>(odds<br>ratio)<br>for BMI<br>increasing<br>allele | p-value | adjusted <sup>a</sup><br>p-value | Direction of<br>effect <sup>b</sup><br>+ / - |
| rs1558902  | <i>FTO</i>                                                      | A / 0.415                                                                    | 0.082 (0.004) | $7.51 \times 10^{-153}$     | <sup>c</sup> rs1421085<br>C / 0.433                                             | 1.068                                                         | 0.03    | 1                                | -                                            |
| rs6567160  | <i>MC4R</i>                                                     | C / 0.236                                                                    | 0.056 (0.005) | $3.93 \times 10^{-53}$      | <sup>c</sup> rs571312<br>A / 0.242                                              | 1.067                                                         | 0.07    | 1                                | NE                                           |
| rs13021737 | <i>TMEM18</i>                                                   | G / 0.828                                                                    | 0.060 (0.004) | $1.11 \times 10^{-50}$      | <sup>c</sup> rs13012571<br>C / 0.166                                            | 0.916                                                         | 0.03    | 1                                | -                                            |
| rs10938397 | <i>GNPDA2; GABRG1</i>                                           | G / 0.434                                                                    | 0.040 (0.003) | $3.21 \times 10^{-38}$      | <sup>c</sup> rs12641981<br>T / 0.437                                            | 1.005                                                         | 0.86    | 1                                | NE                                           |
| rs543874   | <i>SEC16B</i>                                                   | G / 0.193                                                                    | 0.048 (0.004) | $2.62 \times 10^{-35}$      | A / 0.819                                                                       | 0.987                                                         | 0.74    | 1                                | NE                                           |
| rs2207139  | <i>TFAP2B</i>                                                   | G / 0.177                                                                    | 0.045 (0.004) | $4.13 \times 10^{-29}$      | <sup>c</sup> rs943005<br>T / 0.166                                              | 0.949                                                         | 0.20    | 1                                | NE                                           |
| rs11030104 | <i>BDNF</i>                                                     | A / 0.792                                                                    | 0.041 (0.004) | $5.56 \times 10^{-28}$      | A / 0.780                                                                       | 0.985                                                         | 0.68    | 1                                | NE                                           |
| rs3101336  | <i>NEGR1</i>                                                    | C / 0.613                                                                    | 0.033 (0.003) | $2.66 \times 10^{-26}$      | C / 0.649                                                                       | 1.068                                                         | 0.04    | 1                                | NE                                           |
| rs7138803  | <i>BCDIN3D; FAIM2</i>                                           | A / 0.384                                                                    | 0.032 (0.003) | $8.15 \times 10^{-24}$      | G / 0.622                                                                       | 0.965                                                         | 0.25    | 1                                | NE                                           |
| rs10182181 | <i>ADCY3; POMC;<br/>NCOA1</i>                                   | G / 0.462                                                                    | 0.031 (0.003) | $8.78 \times 10^{-24}$      | G / 0.465                                                                       | 1.014                                                         | 0.65    | 1                                | NE                                           |
| rs3888190  | <i>SH2B1;<br/>APOB48R; ATXN2L;<br/>SBK1; SULT1A2;;<br/>TUFM</i> | A / 0.403                                                                    | 0.031 (0.003) | $3.14 \times 10^{-23}$      | C / 0.624                                                                       | 0.965                                                         | 0.26    | 1                                | NE                                           |

- continued -

**Supplementary Table S4: 32 previously known genome-wide significant BMI loci (GIANT, Locke et al., 2015; Extended Data Table 2) assessed in the AN case-control GWAMA (GCAN, Boraska et al., 2014)**

|            |                                        |           |               |                        |                                      |       |      |      |    |
|------------|----------------------------------------|-----------|---------------|------------------------|--------------------------------------|-------|------|------|----|
| rs1516725  | <i>ETV5</i>                            | C / 0.872 | 0.045 (0.005) | $1.89 \times 10^{-22}$ | <sup>c</sup> rs10513801<br>G / 0.127 | 1.019 | 0.68 | 1    | NE |
| rs12446632 | <i>GPRC5B; IQCK</i>                    | G / 0.865 | 0.040 (0.005) | $1.48 \times 10^{-18}$ | G / 0.867                            | 1.057 | 0.21 | 1    | NE |
| rs2287019  | <i>QPCTL; GIPR</i>                     | C / 0.804 | 0.036 (0.004) | $4.59 \times 10^{-18}$ | <sup>c</sup> rs11672660<br>T / 0.211 | 0.990 | 0.79 | 1    | NE |
| rs16951275 | <i>MAP2K5; LBXCOR1</i>                 | T / 0.784 | 0.031 (0.004) | $1.91 \times 10^{-17}$ | <sup>c</sup> rs4776982<br>G / 0.221  | 0.976 | 0.50 | 1    | NE |
| rs3817334  | <i>MTCH2; C1QTNF4;<br/>SPI1; CELF1</i> | T / 0.407 | 0.026 (0.003) | $5.15 \times 10^{-17}$ | C / 0.599                            | 0.971 | 0.35 | 1    | NE |
| rs2112347  | <i>POC5; HMGCR;<br/>COL4A3BP</i>       | T / 0.629 | 0.026 (0.003) | $6.19 \times 10^{-17}$ | <sup>c</sup> rs3797580<br>G / 0.282  | 1.052 | 0.11 | 1    | NE |
| rs12566985 | <i>FPGT-TNNI3K</i>                     | G / 0.446 | 0.024 (0.003) | $3.28 \times 10^{-15}$ | <sup>c</sup> rs6604872<br>C / 0.562  | 0.972 | 0.35 | 1    | NE |
| rs3810291  | <i>ZC3H4</i>                           | A / 0.666 | 0.028 (0.004) | $4.81 \times 10^{-15}$ | G / 0.317                            | 1.031 | 0.35 | 1    | NE |
| rs7141420  | <i>NRXN3</i>                           | T / 0.527 | 0.024 (0.003) | $1.23 \times 10^{-14}$ | T / 0.532                            | 1.016 | 0.61 | 1    | NE |
| rs13078960 | <i>CADM2</i>                           | G / 0.196 | 0.030 (0.004) | $1.74 \times 10^{-14}$ | <sup>c</sup> rs13098327<br>A / 0.189 | 0.954 | 0.23 | 1    | NE |
| rs10968576 | <i>LINGO2</i>                          | G / 0.320 | 0.025 (0.003) | $6.61 \times 10^{-14}$ | A / 0.703                            | 0.998 | 0.95 | 1    | NE |
| rs17024393 | <i>GNAT2; AMPD2</i>                    | C / 0.040 | 0.066 (0.009) | $7.03 \times 10^{-14}$ | NA                                   | NA    | NA   | NA   | NA |
| rs12429545 | <i>OLFM4</i>                           | A / 0.133 | 0.033 (0.005) | $1.09 \times 10^{-12}$ | G / 0.863                            | 1.124 | 0.01 | 0.97 | +  |
| rs13107325 | <i>SLC39A8</i>                         | T / 0.072 | 0.048 (0.007) | $1.83 \times 10^{-12}$ | C / 0.946                            | 0.742 | 0.26 | 1    | NE |
| rs11165643 | <i>PTBP2</i>                           | T / 0.583 | 0.022 (0.003) | $2.07 \times 10^{-12}$ | C / 0.442                            | 0.936 | 0.03 | 1    | -  |
| rs17405819 | <i>HNF4G</i>                           | T / 0.700 | 0.022 (0.003) | $2.07 \times 10^{-11}$ | <sup>c</sup> rs1462433<br>A / 0.290  | 0.911 | 0.01 | 1    | -  |
| rs1016287  | <i>LIC01122</i>                        | T / 0.287 | 0.023 (0.003) | $2.25 \times 10^{-11}$ | C / 0.714                            | 1.000 | 0.99 | 1    | NE |
| rs4256980  | <i>TRIM66; TUB</i>                     | G / 0.646 | 0.021 (0.003) | $2.90 \times 10^{-11}$ | <sup>c</sup> rs10840100<br>A / 0.367 | 1.001 | 0.97 | 1    | NE |

- continued -

**Supplementary Table S4: 32 previously known genome-wide significant BMI loci (GIANT, Locke et al., 2015; Extended Data Table 2) assessed in the AN case-control GWAMA (GCAN, Boraska et al., 2014)**

|            |                                |           |               |                        |                                        |       |      |    |    |
|------------|--------------------------------|-----------|---------------|------------------------|----------------------------------------|-------|------|----|----|
| rs12401738 | <i>FUBP1; USP33</i>            | A / 0.352 | 0.021 (0.003) | $1.15 \times 10^{-10}$ | G / 0.674                              | 0.987 | 0.70 | 1  | NE |
| rs205262   | <i>C6orf106; SNRPC</i>         | G / 0.273 | 0.022 (0.004) | $1.75 \times 10^{-10}$ | G / 0.272                              | 0.976 | 0.49 | 1  | NE |
| rs12016871 | <i>MTIF3; GTF3A</i>            | T / 0.203 | 0.030 (0.005) | $2.29 \times 10^{-10}$ | <sup>c</sup><br>rs1475221<br>G / 0.219 | 1.006 | 0.86 | 1  | NE |
| rs12940622 | <i>RPTOR</i>                   | G / 0.575 | 0.018 (0.003) | $2.49 \times 10^{-09}$ | A / 0.447                              | 0.953 | 0.12 | 1  | NE |
| rs11847697 | <i>PRKD1</i>                   | T / 0.042 | 0.049 (0.008) | $3.99 \times 10^{-09}$ | NA                                     | NA    | NA   | NA | NA |
| rs2075650  | <i>TOMM40; APOE;<br/>APOC1</i> | A / 0.848 | 0.026 (0.005) | $1.25 \times 10^{-08}$ | A / 0.854                              | 0.968 | 0.46 | 1  | NE |
| rs2121279  | <i>LRP1B</i>                   | T / 0.152 | 0.025 (0.004) | $2.31 \times 10^{-08}$ | C / 0.880                              | 0.897 | 0.02 | 1  | -  |
| rs29941    | <i>KCTD15</i>                  | G / 0.669 | 0.018 (0.003) | $2.41 \times 10^{-08}$ | G / 0.686                              | 1.023 | 0.49 | 1  | NE |
| rs1808579  | <i>NPC1; C18orf8</i>           | C / 0.534 | 0.017 (0.003) | $4.17 \times 10^{-08}$ | C / 0.548                              | 0.986 | 0.64 | 1  | NE |

<sup>a</sup> unadjusted p-values are adjusted for multiplicity by Bonferroni correction for 97 tests

<sup>b</sup> Direction of effect: + the BMI increasing allele is *less frequently* found in AN cases as compared to controls; - the BMI increasing allele is more frequently found in AN cases as compared to controls

<sup>c</sup> Proxy SNAP (Broad Institute) with HapMap release 22, CEU population,  $r^2$  threshold of 0.8 and a distance limit of 500 kb; NA; not available; NE: not estimated

**Supplementary Table S5: 32 genome-wide significant loci for BMI, obesity, childhood obesity not described in Locke et al., 2015 (reviewed in Yazdi et al. 2015, Table 2) assessed in the GWAMA for AN (GCAN, Boraska et al., 2014)**

| Gene / BMI increasing SNP / chromosome / trait<br>(Yazdi et al. 2015; Table 2) | Reference alleles in AN case-control GWAMA<br>(GCAN, Boraska et al., 2014) |                                           |                              |
|--------------------------------------------------------------------------------|----------------------------------------------------------------------------|-------------------------------------------|------------------------------|
|                                                                                | Reference allele in AN cases                                               | AN risk (odds ratio) for reference allele | Nominal p-value <sup>b</sup> |
| ADCY9 / rs2531995 / 16 / obesity                                               | T                                                                          | 0.970                                     | 0.33                         |
| BRE / rs116612809 / 2 / BMI                                                    | NA                                                                         | NA                                        | NA                           |
| GNAT2 / rs17024258 / 1 / obesity                                               | NA                                                                         | NA                                        | NA                           |
| GP2 / rs12597579 / 16 / BMI                                                    | T                                                                          | 0.991                                     | 0.94                         |
| GRP120 / rs116454156 / 10 / obesity                                            | NA                                                                         | NA                                        | NA                           |
| HNF4G / rs4735692 / 8 / obesity                                                | <sup>a</sup> rs2060604 T                                                   | 1.088                                     | 0.01                         |
| HOXB5 / rs9299 / 17 / childhood obesity                                        | T                                                                          | 0.969                                     | 0.33                         |
| HS6ST3 / rs7989336 / 13 / obesity                                              | <sup>a</sup> rs912690 C                                                    | 1.012                                     | 0.70                         |
| KCNMA1 / rs2116830 / 10 / obesity                                              | T                                                                          | 0.993                                     | 0.85                         |
| KLF9 / rs11142387 / 9 / BMI                                                    | C                                                                          | 0.964                                     | 0.23                         |
| LEPR / rs11208659 / 1 / childhood obesity                                      | <sup>a</sup> rs11208660 T                                                  | 0.987                                     | 0.81                         |
| LPIN2 / rs643507 / 18 / obesity (asthmatic patients)                           | NA                                                                         | NA                                        | NA                           |
| MAF / rs1424233 / 16 / obesity                                                 | C                                                                          | 1.005                                     | 0.87                         |
| MRPS33P4 / rs13041126 / 20 / obesity                                           | C                                                                          | 1.035                                     | 0.31                         |
| NPC1 / rs1805081 / 18 / obesity                                                | C                                                                          | 1.017                                     | 0.59                         |
| NTRK2 / rs1211166 / 9 / BMI                                                    | <sup>a</sup> rs1187323 C                                                   | 1.060                                     | 0.13                         |
| OLFM4 / rs9568856 / 13 / obesity                                               | <sup>a</sup> rs4883723 A                                                   | 1.134                                     | 0.0037                       |
| OLFM4 / rs9568867 / 13 / obesity                                               | <sup>a</sup> rs12429545 A                                                  | 1.124                                     | 0.01                         |
| PACS1 / rs564343 / 11 / childhood obesity                                      | G                                                                          | 0.994                                     | 0.86                         |
| PCSK1 / rs261967 / 5 / BMI, obesity                                            | <sup>a</sup> rs261966 C                                                    | 0.977                                     | 0.46                         |
| PCSK1 / rs6232 / 5 / BMI, obesity                                              | C                                                                          | 1.262                                     | 0.01                         |
| PCSK1 / rs6234 / 5 / BMI, obesity                                              | <sup>a</sup> rs7713317 G                                                   | 1.025                                     | 0.46                         |

- continued -

**Supplementary Table S5: 32 genome-wide significant loci for BMI, obesity, childhood obesity not described in Locke et al., 2015 (reviewed in Yazdi et al. 2015, Table 2) assessed in the GWAMA for AN (GCAN, Boraska et al., 2014)**

|                                              |                           |       |      |
|----------------------------------------------|---------------------------|-------|------|
| PCSK1 / rs6235 / 5 / BMI, obesity            | <sup>a</sup> rs7713317 G  | 1.025 | 0.46 |
| PRKCH / rs1957894 / 14 / childhood obesity   | <sup>a</sup> rs1957895 T  | 0.964 | 0.48 |
| QPCTL / rs2287019 / 19 / obesity, overweight | <sup>a</sup> rs11672660 T | 0.990 | 0.79 |
| RMST / rs11109072 / 12 / childhood obesity   | <sup>a</sup> rs7963257 G  | 1.093 | 0.28 |
| RPL27A / rs11042023 / 11 / obesity           | T                         | 1.001 | 0.98 |
| RPTOR / rs7503807 / 17 / overweight          | A                         | 0.958 | 0.16 |
| SDCCAG8 / rs12145833 / 1 / childhood obesity | G                         | 0.956 | 0.30 |
| TNKS / rs17150703 / 8 / childhood obesity    | A                         | 0.938 | 0.22 |
| TOMM40, APOE, APOC1 / rs2075650 / 19 / BMI   | G                         | 1.033 | 0.46 |
| ZZZ3 / rs17381664 / 1 / obesity              | C                         | 0.984 | 0.62 |

<sup>a</sup>Proxy SNAP (Broad Institute) with HapMap release 22, CEU population,  $r^2$  threshold of 0.8 and a distance limit of 500 kb

<sup>b</sup>unadjusted p-values, p-values adjusted for multiplicity by Bonferroni correction for 32 tests are only given if significant after correction

NA: not available



**Supplementary Table S6: 68 genome-wide significant WHR loci from a European GWAMA primary analysis (GIANT, Shungin et al., 2015; Tables 1 and 3) assessed in the GWAMA for AN (GCAN, Boraska et al., 2014)**

| SNP / WHR<br>(Shungin et al., 2015) | Reference alleles in AN case-control GWAMA<br>(GCAN, Boraska et al., 2014) |                                              |                              |
|-------------------------------------|----------------------------------------------------------------------------|----------------------------------------------|------------------------------|
|                                     | Reference allele in AN cases                                               | AN risk (odds ratio)<br>for reference allele | Nominal p-value <sup>b</sup> |
| rs905938                            | C                                                                          | 0.974                                        | 0.45                         |
| rs10919388                          | NA                                                                         | NA                                           | NA                           |
| rs1385167                           | G                                                                          | 0.990                                        | 0.83                         |
| rs1569135                           | A                                                                          | 1.004                                        | 0.91                         |
| rs10804591                          | A                                                                          | 1.076                                        | 0.06                         |
| rs17451107                          | <sup>a</sup> rs10049088 T                                                  | 1.083                                        | 0.01                         |
| rs3805389                           | A                                                                          | 0.953                                        | 0.17                         |
| rs9991328                           | C                                                                          | 1.039                                        | 0.21                         |
| rs303084                            | A                                                                          | 0.978                                        | 0.54                         |
| rs9687846                           | <sup>a</sup> rs3843467 T                                                   | 0.964                                        | 0.35                         |
| rs6556301                           | NA                                                                         | NA                                           | NA                           |
| rs7759742                           | <sup>a</sup> rs6932542 A                                                   | 1.027                                        | 0.38                         |
| rs1776897                           | G                                                                          | 0.991                                        | 0.87                         |
| rs7801581                           | NA                                                                         | NA                                           | NA                           |
| rs7830933                           | <sup>a</sup> rs13273073 T                                                  | 1.011                                        | 0.75                         |
| rs12679556                          | T                                                                          | 1.001                                        | 0.98                         |
| rs10991437                          | A                                                                          | 0.986                                        | 0.78                         |
| rs7917772                           | G                                                                          | 1.033                                        | 0.30                         |
| rs11231693                          | NA                                                                         | NA                                           | NA                           |
| rs4765219                           | A                                                                          | 1.020                                        | 0.54                         |
| rs8042543                           | T                                                                          | 1.027                                        | 0.47                         |
| rs8030605                           | A                                                                          | 0.940                                        | 0.18                         |

- continued -

Supplementary Table S6: 68 genome-wide significant WHR loci from a European GWAMA primary analysis (GIANT, Shungin et al., 2015; Tables 1 and 3) assessed in the GWAMA for AN (GCAN, Boraska et al., 2014)

|            |                           |       |      |
|------------|---------------------------|-------|------|
| rs1440372  | T                         | 1.011 | 0.74 |
| rs2925979  | T                         | 1.041 | 0.23 |
| rs4646404  | A                         | 0.942 | 0.06 |
| rs8066985  | <sup>a</sup> rs1120297 C  | 0.965 | 0.24 |
| rs12454712 | C                         | 1.001 | 0.97 |
| rs12608504 | A                         | 1.023 | 0.48 |
| rs4081724  | NA                        | NA    | NA   |
| rs979012   | T                         | 0.998 | 0.95 |
| rs224333   | G                         | 0.981 | 0.53 |
| rs6090583  | G                         | 0.969 | 0.31 |
| rs1534696  | C                         | 0.961 | 0.20 |
| rs2645294  | C                         | 0.962 | 0.21 |
| rs714515   | A                         | 1.039 | 0.22 |
| rs2820443  | C                         | 1.013 | 0.70 |
| rs10195252 | T                         | 1.005 | 0.86 |
| rs17819328 | G                         | 0.984 | 0.61 |
| rs2276824  | NA                        | NA    | NA   |
| rs2371767  | <sup>a</sup> rs4616635 C  | 0.998 | 0.95 |
| rs1045241  | T                         | 0.949 | 0.12 |
| rs7705502  | <sup>a</sup> rs17695092 G | 1.008 | 0.80 |
| rs1294410  | <sup>a</sup> rs1294409 C  | 0.973 | 0.39 |
| rs1358980  | T                         | 0.983 | 0.57 |
| rs1936805  | C                         | 1.003 | 0.92 |
| rs10245353 | <sup>a</sup> rs1055144 T  | 0.997 | 0.93 |

- continued -

**Supplementary Table S6: 68 genome-wide significant WHR loci from a European GWAMA primary analysis (GIANT, Shungin et al., 2015; Tables 1 and 3) assessed in the GWAMA for AN (GCAN, Boraska et al., 2014)**

|            |                           |       |      |
|------------|---------------------------|-------|------|
| rs10842707 | <sup>a</sup> rs718314 G   | 1.042 | 0.24 |
| rs1443512  | C                         | 1.042 | 0.26 |
| rs2294239  | G                         | 1.028 | 0.37 |
| rs10925060 | NA                        | NA    | NA   |
| rs10929925 | <sup>a</sup> rs12104582 C | 0.966 | 0.25 |
| rs2124969  | <sup>a</sup> rs6731260 G  | 0.978 | 0.48 |
| rs17472426 | G                         | 1.037 | 0.51 |
| rs7739232  | A                         | 1.054 | 0.38 |
| rs13241538 | <sup>a</sup> rs13234407 A | 0.992 | 0.79 |
| rs7044106  | <sup>a</sup> rs1359328 T  | 1.022 | 0.56 |
| rs11607976 | T                         | 1.071 | 0.03 |
| rs1784203  | <sup>a</sup> rs4753523    | 0.983 | 0.63 |
| rs1394461  | C                         | 0.972 | 0.44 |
| rs319564   | T                         | 0.966 | 0.27 |
| rs2047937  | C                         | 1.035 | 0.26 |
| rs2034088  | T                         | 0.999 | 0.97 |
| rs1053593  | T                         | 0.982 | 0.56 |
| rs1664789  | C                         | 0.993 | 0.83 |
| rs722585   | A                         | 0.995 | 0.88 |
| rs1144     | <sup>a</sup> rs4753534    | 0.941 | 0.05 |
| rs2398893  | G                         | 0.923 | 0.02 |
| rs4985155{ | G                         | 1.071 | 0.03 |

<sup>a</sup>Proxy SNAP (Broad Institute) with HapMap release 22, CEU population, r2 threshold of 0.8 and a distance limit of 500 kb

<sup>b</sup>unadjusted p-values, p-values adjusted for multiplicity by Bonferroni correction for 68 tests are only given if significant after correction

NA: not available; NE: not estimated

**Supplementary Table S7: *In silico* mutation analyses pertaining to the four identified genes (ExAC Browser (Beta); Exome Aggregation Consortium)\***

| <b>Gene</b>   | <b>Different missense mutations<br/>(allele frequencies)</b> | <b>Different nonsense mutations<br/>(allele frequencies)</b> | <b>Different frameshift mutations<br/>(allele frequencies)</b> |
|---------------|--------------------------------------------------------------|--------------------------------------------------------------|----------------------------------------------------------------|
| <i>CTBP2</i>  | 439<br>(0.0000082 - 0.49)                                    | 13<br>(0.0000083 - 0.082)                                    | 29<br>(0.0000083- 0.002)                                       |
| <i>CCNE1</i>  | 99<br>(0.000008236 - 0.002)                                  | 1<br>(0.000008240)                                           | none                                                           |
| <i>CARF</i>   | 211<br>(0.000008281 - 0.091)                                 | 9<br>(0.000008282 - 0.005)                                   | 9<br>(0.000008281 - 0.003)                                     |
| <i>NBEAL1</i> | 578<br>(0.000008280 - 0.064)                                 | 27<br>(0.000008287 -0.0005)                                  | 22<br>(0.000008281 - 0.009)                                    |

Exome Aggregation Consortium (ExAC), Cambridge, MA (URL: <http://exac.broadinstitute.org>) [May, 2015 accessed].

\*The data set provided on this website spans 60,706 unrelated individuals sequenced as part of various disease-specific and population genetic studies. The ExAC Principal Investigators and groups that have contributed data to the current release are listed on the website.

All data here are released under a Fort Lauderdale Agreement for the benefit of the wider biomedical community.

**Supplementary Table S8: association test of the nine AN / BMI SNPs with adult obesity in GIANT extreme (order of SNPs as in Table 1)**

| SNP        | Gene          | extreme BMI |        |           | overweight |        |           | obesity class I |        |           | obesity class II |        |           | obesity class III |        |           |
|------------|---------------|-------------|--------|-----------|------------|--------|-----------|-----------------|--------|-----------|------------------|--------|-----------|-------------------|--------|-----------|
|            |               | P           | Ncases | Ncontrols | P          | Ncases | Ncontrols | P               | Ncases | Ncontrols | P                | Ncases | Ncontrols | P                 | Ncases | Ncontrols |
| rs1561589  | <i>CTBP2</i>  | 0.02        | 7435   | 7576      | 0.0083     | 92546  | 65729     | 0.011           | 32618  | 64727     | 0.067            | 9738   | 61015     | 0.08              | 2544   | 37624     |
| rs12771627 | <i>CTBP2</i>  | 0.023       | 6685   | 6818      | 0.022      | 92086  | 65661     | 0.005           | 32350  | 64659     | 0.038            | 9670   | 60489     | 0.095             | 2481   | 35261     |
| rs11245456 | <i>CTBP2</i>  | 0.013       | 6635   | 6760      | 0.041      | 92025  | 65634     | 0.011           | 32311  | 64633     | 0.014            | 9657   | 60484     | 0.0091            | 2481   | 35257     |
| rs17513613 | <i>CCNE1</i>  | 0.053       | 7139   | 7289      | 0.086      | 90410  | 64768     | 0.048           | 31977  | 63972     | 0.026            | 9601   | 60401     | 0.0086            | 2673   | 42125     |
| rs17406900 | <i>CARF</i>   | 0.00037     | 7847   | 7995      | 0.069      | 92976  | 65801     | 0.0018          | 32848  | 65800     | 0.019            | 9867   | 62474     | 0.26              | 2829   | 45550     |
| rs7593917  | <i>NBEAL1</i> | 0.00042     | 7844   | 7991      | 0.04       | 92899  | 65777     | 0.0036          | 32838  | 65776     | 0.039            | 9864   | 62450     | 0.24              | 2830   | 45583     |
| rs11691351 | <i>NBEAL1</i> | 0.00037     | 7850   | 7996      | 0.037      | 92962  | 65810     | 0.0034          | 32829  | 65809     | 0.035            | 9855   | 62494     | 0.23              | 2827   | 45570     |
| rs8102137  | <i>CCNE1</i>  | 0.049       | 7142   | 7290      | 0.098      | 89977  | 64766     | 0.05            | 32035  | 64049     | 0.021            | 9627   | 60445     | 0.0054            | 2701   | 42220     |
| rs7573079  | <i>NBEAL1</i> | 0.00023     | 7849   | 7994      | 0.042      | 92989  | 65822     | 0.0045          | 32848  | 65821     | 0.023            | 9867   | 62495     | 0.25              | 2831   | 45572     |

Data were derived from Berndt, et al. 2013: extreme BMI upper and lower 5% of the BMI distribution; other controls were subjects with BMI < 25 kg/m<sup>2</sup> and cases were defined as having BMI ≥ 25 kg/m<sup>2</sup> for the overweight class, BMI ≥ 30 kg/m<sup>2</sup> for obesity class I, BMI ≥ 35 kg/m<sup>2</sup> for obesity class II and BMI ≥ 40 kg/m<sup>2</sup> for obesity class III
